1 **Diversity of Archaea Domain in Cuatro Ciénegas Basin: Archaean Domes**

2

3 Medina-Chávez Nahui Olin<sup>1</sup>, Viladomat-Jasso Mariette<sup>2</sup>, Olmedo-Álvarez Gabriela<sup>3</sup>, Eguiarte Luis

4 E<sup>2</sup>, Souza Valeria<sup>2</sup>, De la Torre-Zavala Susana<sup>1,4</sup>

5

6 *<sup>1</sup>Universidad Autónoma de Nuevo León, Facultad de Ciencias Biológicas, Instituto de*

7 *Biotecnología. Av. Pedro de Alba S/N Ciudad Universitaria. San Nicolás de los Garza, Nuevo León,*

8 *México. C.P. 66455.*

9 *<sup>2</sup>Instituto de Ecología, UNAM, Circuito Exterior S/N anexo Jardín Botánico exterior. Ciudad*

10 *Universitaria, Ciudad de México, C.P. 04500*

11 *<sup>3</sup>Departamento de Ingeniería Genética, Centro de Investigación y de Estudios Avanzados del I.P.N.*

12 *Campus Guanajuato, AP 629 Irapuato, Guanajuato 36500, México*

13

14 <sup>4</sup>Correspondence should be addressed to Susana De la Torre-Zavala;

15 susana.delatorrezv@uanl.edu.mx.

16

17

18

19

20

21

22

## 23 **Abstract**

24 Herein we describe the Archaea diversity in a shallow pond in the Cuatro Ciénegas Basin (CCB),  
25 Northeast Mexico, with fluctuating hypersaline conditions containing elastic microbial mats that  
26 can form small domes where their anoxic inside reminds us of the characteristics of the Archaean  
27 Eon, rich in methane and sulfur gases; thus, we named this site the Archaean Domes (AD). These  
28 domes only form after heavy rains that are rare in the Chihuahuan desert. CCB is a unique oasis  
29 with hundreds of ponds, containing endemic species of animals, plants and highly diverse and  
30 unique microbial communities, despite its very biased stoichiometry, due mostly to extreme low  
31 phosphorus content (soils, water columns and sediments). This extreme oligotrophy has favored  
32 survival of ancestral microorganisms. Whole metagenome sequencing approach was performed for  
33 this unusual site in three different seasons to assess the extent of the Archaea biodiversity, with a  
34 focus on extremophiles, since members of the Archaea had been underrepresented in different study  
35 sites within the oasis. We found a highly diverse Archaea community compassing ~5% of the  
36 metagenomes. The archaeal portion in all three metagenomes maintained its abundance and most of  
37 the strains showed to form a resilient core during three seasonal samplings (2016-2017), despite  
38 environmental fluctuations. However, relative abundances of all 230 archaeal OTUs (defined using  
39 a 97% cutoff) were low enough (<0.1%) to be considered part of the rare biosphere. AD finding and  
40 their description within CCB confirms that this particular pond is the most diverse for Archaea that  
41 we are aware of and opens new paths for understanding the forces that once drove and keep shaping  
42 microbial community assemblage.

43

44

45

## 46 **Introduction**

47 The Archaea domain is an essential but usually rare, component of different ecosystems, not only  
48 extreme ones as originally suggested [1-4], for instance, they are critical in hydrological systems  
49 and their abundance and composition changes according to identifiable spatial and temporal scales  
50 [5-7]. Archaea is represented in 26 phyla [8], most of which are novel and some lineages include  
51 only one species of uncultivated strains that have been assembled through metagenomics [9, 10].  
52 Indeed, a current challenge in their study is the isolation and cultivation of novel Archaea, since  
53 they are usually restricted to extreme conditions. Traditional culture-dependent approaches have  
54 underestimated abundance and diversity of Archaea, making it hard to achieve an accurate  
55 understanding of their role in microbial communities in an ecological niche [11]. Nevertheless, a  
56 successful co-cultivation of an Asgard archaeon associated with bacteria was reported after a long-  
57 term methane-fed bioreactor culture of deep marine sediments, demonstrating that non-traditional  
58 cultures of untapped environments are reservoirs of Archaea genetic and functional diversity yet to  
59 be uncovered [12]. Another challenge is to fully comprehend their phylogenetic association, given  
60 the limited genetic information available for some Archaea phyla.

61 In the last decade, our knowledge on the diversity and taxonomy of Archaea has  
62 substantially improved [13] due to the rise of metagenomics and increasing available archaeal  
63 genomes. The Archaea tree is being rapidly filled up with new branches, demonstrating that the  
64 Archaea domain remains largely unexplored [14] along with a diverse metabolism [15, 16],  
65 unveiling new processes and key features involving microbes and community structure.

66 Cuatro Ciénegas Basin (CCB) is an endangered oasis within the northern zone of the  
67 Chihuahuan Desert in Mexico, characterized by an extremely unbalanced nutrient stoichiometry of  
68 the area (N:P = 159:1), similar to the conditions of the Precambrian sea [17-21]. Strikingly, despite

69 this nutrient deficiency CCB is considered a biodiversity hotspot for macroorganisms [22] and one  
70 of the most diverse sites for microorganisms in the world [23-27]; this microbial biodiversity is  
71 mirrored by its extreme diversity in virus [28]. CCB biodiversity is believed to have evolved as a  
72 result of a long time environmental stability of a deep aquifer [29], as suggested by the marine  
73 affiliations in many of the studied bacterial genomes [25, 30], virus [31], and probably, Archaea.  
74 These observations led CCB scientists to raise hypothesis and propose CCB as a model of “*lost*  
75 *world*”, where extreme conditions favored the survival of ancestral marine lineages that in some  
76 cases persist exclusively in this area [32]. Nevertheless, Archaea in CCB has been poorly studied  
77 since they were underrepresented in previous metagenomic studies [24, 28, 33, 34].

78         During a late March 2016 field work, an atypical spring rain apparently dissolved the salty  
79 crust of an unnoticed shallow pond, allowing the uniquely flexible and impermeable microbial mats  
80 to arise from the ground building bubbles, or domes with a strong sulfur-like smell. Our hypothesis  
81 was that gas production of methanogenic as well as other microorganisms associated to the sulfur  
82 cycle were degassing creating a locally anaerobic atmosphere. Therefore, the anaerobic layer of the  
83 microbial mats were creating the domes by raising the flexible and impermeable mat where  
84 photosynthesis was evident given the purple, and green layers, creating an unique “alien” local  
85 landscape (Figure 1). Based on the macroscopic morphology of the microbial mats, this locality in  
86 the Pozas Azules ProNatura ranch (a private ecological reserve) was named by us the “Archean  
87 Domes” (AD thereafter) (Fig. 1a).

88         These unusual structures in an small extremophilic and fluctuating pond, are by themselves a  
89 singularity, within CCB unique nature and amazing microbial diversity that has fascinated scientists  
90 with unexpected findings [19-21, 25, 27, 29, 30, 33, 35-43]. High salt concentration in dry  
91 conditions, and the production of biogases along dome formation under wet conditions, suggested

92 that this fluctuating evaporitic hypersaline microbial mat would be an ideal place to explore the  
93 Archaea diversity in CCB.

94         Considering the taxonomic profiling of different ponds previously studied within the Cuatro  
95 Cienegas system along 20 years [17, 28, 30, 33, 37-39, 41, 44-53], a working hypothesis was  
96 proposed for the community composition of AD microbial mat: that each sample would be unique,  
97 given the drastic environmental fluctuations. A null hypothesis would predict that the AD  
98 community would constitute a unique community with a constant core community, able to construct  
99 the domes given the right environmental conditions (heavy rain). In order to explore these  
100 hypotheses for the Archaea domain, a whole genome metagenomic approach was applied to explore  
101 the community shaping the AD microbial mat, expecting to achieve a coverage depth sensitive  
102 enough for the rare biosphere. Sampling for AD was done in three seasons (dry-wet-dry).

103         As mentioned above, Archaea had not been observed to be diverse or abundant in CCB,  
104 however, we found in this study that the Archaeal Domes displayed an abundant and diverse  
105 archaeal community. Even more, they represent one of the most diverse archaeal communities  
106 known up to date in the world. Unexpectedly, this diversity is not only very large given the small  
107 geographical scale of this site (at cm<sup>2</sup> level), but it is constant along all sampling seasons. This  
108 novel window to the Archaea world will be a biodiversity resource that may provide us with paths  
109 to understand the uniqueness that CCB *lost world* represents for ecology, evolution, systematics and  
110 future bioprospecting studies.

111

## 112 **2. Material and Methods**

113 *2.1 Sampling site.* Water and sediment were obtained from the Archaeal Domes (AD) in Rancho  
114 Pozas Azules, from Pronatura Noreste (26° 49' 41.7" N 102° 01' 28.7" W) in CCB, under

115 SEMARNAT scientific permit No. SGPA/DGVS/03121/15 (Figure 1). Sampling took place during  
116 2016-2017 at the following times: April 2016 (dry, AD1), September 2016 (wet, AD2), February  
117 2017 (dry, AD3); microbial mats and sediments (8 cm<sup>2</sup>) were transferred to sterile conical tubes (50  
118 mL) and used for metagenomic analysis.

## 119 *2.2 Metadata.*

120 Following the National Meteorological System data base for the Pozas Azules ranch weather station  
121 (Supplementary material), we observed that in March 2016, there was an anomalous spring rain  
122 peak (90 mm) that apparently allowed us to discover the AD. The 10<sup>th</sup> of April sampling occurred  
123 when maximum air temperatures where ~ 30° C, and the domes were drying. In average,  
124 precipitation in early fall, reached 48 mm in September 2016, during our wet sampling date, and no  
125 rain were detected during February 2017, making it another dry sampling. The water  
126 physicochemical conditions were measured in September 2016 sampling, using a Hydrolab MS5  
127 Water multiparameter sonde (OTT Hydromet GmbH, Germany) (Supp. Table 1). Other sampling  
128 dates were not tested due to the lack of water in the ponds (see Figure 1).

129 *2.3 Total DNA Extraction.* Extraction of total DNA from Archaeal domes sediment was performed  
130 in Experimental and Molecular Evolution Laboratory of the Ecology Institute, UNAM as reported  
131 before [24] using a modification of Purdy et al. (1996) [54] protocol.

132 *2.4 Metagenomic Shotgun Sequencing.* Total DNA from sediment of the three seasoned samples  
133 (AD1, AD2, and AD3) were sent to CINVESTAV- LANGEBIO, Irapuato, Mexico, for shotgun  
134 whole genome sequencing using Illumina Mi-Seq 2x300 technology.

135 *2.5 Bioinformatic analysis for metagenomes.* Raw data from AD1, AD2 and AD3, was quality  
136 checked using FastQC (<http://www.bioinformatics.babraham.ac.uk/projects/fastqc>). Indexed adapter  
137 and barcodes were removed and low quality sequences were discarded with Trimmomatic v0.36  
138 using a sliding window of 4pb and an average quality per base of 25 [55], followed by the merging

139 of the paired end reads using PEAR software [56]. Once reads were merged, both paired ends  
140 assembled and unassembled reads were used to cover major accuracy to obtain relative abundance  
141 for Eukarya, Bacteria and Archaeal species using MetaPhlAn2 software [57].

142 *2.6 Diversity analysis and species accumulation curve.* Using normalized relative abundances of  
143 Archaeal taxa within each metagenome,  $\alpha$  and  $\beta$  diversity were calculated using EstimateS 9.1.0  
144 and Past Software, respectively [58, 59].

145 *2.7 Phylogenetic analysis.* Reference 16S rRNA sequences were downloaded from the NCBI- *Gen*  
146 *Bank* and *RNA Central* Database according to identifications of MetaPhlAn2 hits. The sequences  
147 were aligned with ClustalW [60] and trimmed using MEGA V 7.0 [61]. The phylogeny was  
148 reconstructed with a Maximum Likelihood (ML) algorithm in MEGA and K-2 + G (Kimura 2-  
149 parameter + gamma distribution) evolutionary model with 10,000 bootstraps. Also reference strains  
150 were added to supply a robust interpretation.

151 *2.8 Identification number of Metagenomic Data.* The identification number for the metagenomic  
152 data used in this study are available in MG-RAST with the following ID: AD 1: mgm4856917.3,  
153 mgm4856915.3; AD 2: mgm4856913.3, mgm4856914.3; AD 3: mgm4856916.3, mgm4856918.3,  
154 and also using the following link: <https://www.mg-rast.org/linkin.cgi?project=mgp90438>.

155

156

157

158

159

160

161

## 162 **3. Results**

163

### 164 **3.1. The “Archaean Domes” are hypersaline non-lithifying microbial mats.**

165 After obtaining the necessary collecting permits and adequate equipment, sample collection of the  
166 AD was conducted in early April 2016. By then, the AD site was starting to dry, and the mat  
167 exhibited a morphology in which a photosynthetic upper layer became evident in the dome-like  
168 structure, while the interior of the domes maintained a wet black layer (Fig. 1b). Physicochemical  
169 and environmental conditions of AD were registered on April 2016, September 2016, and February  
170 2017, that is, during dry and wet conditions (Table 1 and Supp. Table 1). Further observations (not  
171 shown) after four years revealed that during the dry seasons, AD microbial mats are active even if  
172 they do not produce domes. Moreover, it is only after heavy rains dissolve the salts, that domes  
173 emerge due to the elastic nature of the mats, producing its typical sulfur-like smell. We have  
174 observed the same phenomena up to last exploration September 2019.

175 The AD mats sampled on April 10<sup>th</sup>, 2016, looked different from the original observation  
176 (less than 3 weeks earlier). What firstly seemed like a shallow pond, was already drying up when  
177 the first sample was collected for sequencing (AD1), and the dense salty liquid started to turn into a  
178 salty-white-carbonate crust. As can be seen in Figure 1C, in, the second sampling (AD2, September  
179 2016) represented a more wet environment, and the site looked similar to the one observed  
180 originally (i.e., March 2016), although the domes were smaller. The last sample of this study was  
181 collected in February 2017, by the end of the cold-dry season (AD3).

182 The microbial community of the AD is approximately 200 m away from the most described,  
183 stromatolite-rich and iconic blue pond from Rancho Pozas Azules, but physicochemical conditions  
184 found in the AD are extreme in salinity and higher in pH (Table 1). While Blue Pond pH is 7.9 [62,



185 63], pH of AD almost peaks 10. Moreover, in the first sampling (AD1), salinity was 53%, and it  
186 reached saturation later in that year, when the upper layer of the mat became a white salty crust,  
187 which prevented measurement with the available equipment for consistent results. Considering all  
188 the above, we can describe the AD as a hypersaline microbial mat [64].

189

### 190 **3.2. The Archaea domain in the Archaean Domes.**

191 The Illumina MiSeq run of 300-bp paired-ends delivered 28,859,454 reads for AD1, 24,772,053  
192 reads for AD2 and 28,203,484 reads for AD3 of total DNA metagenomics, which were normalized  
193 for bioinformatic analysis. The percentage for relative abundance of the Archaea domain in AD1,  
194 AD2, and AD3, were 3.6%, 5% and 5% respectively. The binning of the metagenomic reads  
195 showed that the archaeal community in the AD metagenomes was dominated by Euryarchaeota-  
196 halophilic archaeal lineages. Sequences from Crenarchaeota, Thaumarchaeota, Korarchaeota, and  
197 Nanoarchaeota phyla were also retrieved (Fig. 2). All five phyla comprise 15 classes dominated by  
198 members of Halobacteria and Methanomicrobia classes (Fig. 2), both important groups of the  
199 Euryarchaeota phylum. Additionally, 25 orders, 36 families, 93 genera, and 230 *species* (defined as  
200 OTUs at 97% cutoff) were detected in the three metagenomes. It is noteworthy that from those 230  
201 OTUs, a total of 24 could not be further classified (Supp. Fig.2).

202 To depict the extent of the biodiversity present within the AD metagenomes, we retrieved  
203 from the marker databases the 16S rRNA sequences corresponding to the species identified by  
204 MetaPhlan2. We used these sequences to reconstruct a phylogeny (Fig. 3). Several sequences  
205 belonging to the same genera were omitted to avoid redundancy; others without a full-length marker  
206 sequence were also omitted. The phylogenetic reconstruction displays 213 sequences, 169  
207 belonging to our mining and 44 are reference sequences. Five phyla were represented, that gave rise  
208 to 11 major clades.

209 Alpha diversity was calculated using Shannon, Simpson and Chao indexes (Table 2a).  
210 Compared to the fluctuations observed in several bacterial studies in CCB [65], the archaeal  
211 diversity did not show drastic changes through sampling seasons (Table 2a). Moreover, 90% of the  
212 total archaeal richness (OTUs at 97% cutoff level) is shared among the three samples. This is  
213 confirmed by the Beta diversity estimates at species level (Table 2 b). Overall, richness evaluated at  
214 the other different taxonomic levels (i.e., using the 15 classes, the 25 orders, and/or the 36 families)  
215 of Archaea, remain similar in the three metagenomes.

216 In accordance with the Archaea's stable core hypothesis for the AD, the species  
217 accumulation curve shows that the inventory for every sample (AD1, AD2, AD3) was very similar.  
218 The expected diversity using the presence and absence for every identified OTUs in the  
219 metagenomic analysis increased very little with the addition of each sample. Therefore, OTU  
220 rarefaction curve with data from the 3 samples is asymptotic (Suppl. Fig. 1).

221

### 222 ***3.3 The Archaeal Domes Rare Biosphere.***

223 Considering that 229 of the 230 identified archaeal OTUs are each present at relative abundances  
224 below 0.1%, we applied a strict threshold of 0.01% of relative abundance [66] to identify what we  
225 consider *strictly rare* archaeal taxa. Consequently, within the AD mats, 50 archaeal OTUs were  
226 defined to be strictly rare (each covering less than <0.01% of the total reads). Interestingly, such  
227 abundance profiles along the three sampling times show that 11 OTUs of the strictly rare Archaea  
228 taxa seem to be *conditionally rare* [67], that is, these taxa maintain their lower abundance in only  
229 one sample, and reach higher (while still rare <0.1%) abundances in other samples (Fig. 3A). This  
230 suggests that while the rest of the Archaea community is relatively stable, the strictly rare biosphere  
231 is dynamic and depends on the proper conditions to prosper. On the other hand, we found that 39  
232 strictly rare Archaea OTUs were not detected in at least one metagenome (Fig. 3B). These taxa

233 exhibiting this kind of fluctuation along time series are considered *transiently rare* taxa [68]. Notice  
234 that sample season 2 (wet) shows a peak of transient rare taxa, suggesting that it is possible that  
235 dome construction during wet conditions can benefit by this change in population dynamics, while  
236 other taxa seem to prosper in the extremely salty environment.

237

#### 238 ***4. Discussion***

239 The microbial community that constitute the AD microbial mats is indeed unique among the studied  
240 CCB bacterial communities [21], displaying a relative high abundance of Archaea in AD1, AD2,  
241 and AD3, that reached 3.6%, 5% and 5% respectively. Those abundances are remarkable for such a  
242 small sampled area (cm<sup>2</sup>), but also when compared to other sites in CCB and the world (see Table  
243 1) [69-71]. After profiling the community at several taxonomic levels, it was observed that an  
244 archaean community core remained almost intact in time (April 2016-February 2017). This  
245 provided evidence for stability behind the construction of the domes (our null hypothesis).  
246 Nevertheless, within that core, the diversity and proportions of rare archaeal taxa increased or  
247 diminished across seasons, exhibiting a dynamic in the AD which might be playing a role for their  
248 functioning along different environmental conditions.

249

#### 250 ***4.1 The Archaeal Domes at CCB are a good model of the Archaeal period, and are one of the*** 251 ***most abundant and diverse environments for Archaea.***

252 Microbial mats and stromatolites are considered analogues of early Earth, when they originated as  
253 successful ecological communities, capable of complete nutrient cycling as soon as life started to  
254 diversify in the early Archean Eon [72, 73]. Different ancestral lineages have survived at CCB [21,  
255 30], purportedly because they have adapted continuously to their neighbors, forming very tight

256 communities that cohesively survive despite the changing harsh abiotic factors, like those  
257 experienced along their very long evolutionary trajectory [21]. We believe, that the microbial mat of  
258 AD is not an exception in CCB, however, the observation that raised scientific interest to study  
259 these particular mats was precisely its extreme conditions of pH and salinity, besides their  
260 interesting “architectural” shape. Notwithstanding, analogue extreme environmental conditions  
261 have been reported in other archaeal rich microbial mats before, for instance in the Desert of  
262 Atacama or the human made salterns in Guerrero Negro, both stable environments (Table 1) show  
263 much lower Archaea diversity [69-71]. A possibility is that the fluctuating environment in AD are  
264 part of the community dynamics increasing possible niches, and it has been observed within CCB in  
265 other fluctuating environments that harbor large diversity due to local adaptations to each condition  
266 [37, 74]. However, the AD mat is peculiar because Archaea are more abundant and diverse than in  
267 other fluctuating microbialites within CCB [62] (Table 1). Moreover, this is the first site where  
268 there is a constant microbial core despite the environmental fluctuations among seasons. Not only  
269 Archaea diversity within AD is relatively constant, it is also considerably large for a metagenomic  
270 study using the Illumina platform [75].

271         On the other hand, targeted clone libraries for Archaeal primers have revealed a high  
272 abundance of Archaea (~10%) in stromatolites communities of the Hammelin Pool in SharkBay,  
273 Australia, which reaches one of the highest archaeal abundances. However, such archaeal  
274 community was represented by 27 archaeal clones, out of 176 total of 16S rRNA clone library from  
275 a single sample point [76]. These numbers are hard to compare to our observed AD archaeal  
276 diversity due to different experimental approaches. Other archaeal-rich hypersaline microbial mats  
277 show relative abundances of Archaea that range from 4% in a mat in Camargue, Spain. [77], 9% in  
278 Guerrero Negro hypersaline mat [78], 20% in some layers of the microbial mat in a shallow pond in

279 the Salar de Llamara [79], and above 90% of 16S rRNA of sequences amplified in a highly lithified  
280 mat in Laguna de Tebenchique, in the Salar de Atacama [69]. Nevertheless, all these Archaea-rich  
281 sites, display lower diversity [80] than our small (cm<sup>2</sup>) seasonal AD. Given the extremely small  
282 site, our 230 different species (at 97% cutoff) and 5 different phyla can be considered high.  
283 Noticeably, our 24 unclassified archaeal OTUs (Supp. Figure 2), constitute an interesting challenge  
284 for systematics and biodiscovery.

285         The CCB is well known for its outstanding microbial diversity and unique endemic lineages  
286 [25, 28, 35, 40, 74, 81] that have been isolated from the rest of the world; this uniqueness may be in  
287 part the result of its extremely biased stoichiometry [17, 19, 44]. Success of archaeal communities  
288 in the AD may rely on physiological adaptations that could for instance allow them to out-compete  
289 bacteria in specific niches with low energy or nutrients availability [82]. However, previously  
290 studied localities within CCB displaying the same low energy stress, such as Pozas Rojas microbial  
291 mat, lack similar numbers of Archaea. Pozas Rojas exhibits extreme N:P ratios (156:1), and also  
292 fluctuating environments [33]. Despite all of the above, until AD were uncovered, archaeal  
293 abundances and diversity had not been reported before as a distinctiveness in any of the numerous  
294 explored sites within CCB [24, 27, 28, 35]. The abundance of Euryarchaeota members (halophiles  
295 and methanogens) may be related to the high-carbonate, salty-crust upper layer, and the black  
296 methanogenic bottom strata, acting as barriers on both sides on the mat.

297         The estimated  $\alpha$  and  $\beta$  diversity indexes for the AD samples suggest resilience of the  
298 community, which is expected to be largely influenced by species diversity, as explained by the  
299 insurance hypothesis [83]. Our data shows a slight increase in archaeal diversity and richness  
300 indexes in dry seasons compared to the sample from the wet season (Table 2), possibly because that

301 is the usual state of the AD site, since annual precipitations are not heavy enough to dissolve the  
302 salts and change the ecology of the mats (Supp. Table 1)

303 Another plausible explanation for an increased abundance and diversity in the Archaea  
304 domain in the AD mats is the *killing-the-winner* hypothesis [84], that proposes a negative  
305 frequency-dependent selection, in which bacterial types are affected by viral pressure, promoting  
306 the survival and viability of rare types, and thus maintaining high diversity. Viral reads in our AD  
307 metagenomes represent a relative abundance ranging from 23.3% to 31.6%, which is remarkably  
308 high compared to other metagenomes, and even higher than typical virus-rich environments, such as  
309 those obtained from samples of filtered sea water in South Korea [85], several deep sea sediments  
310 [86] and microbialites from SharkBay, Australia [71].

311

#### 312 ***4.2 The rare biosphere in the AD community.***

313 Rare biosphere may represent a reservoir of genetic diversity that actively responds to  
314 environmental changes [87]. Given the predominance of an equitable rare biosphere in all the  
315 previously sampled sites of CCB [24], and the extreme and unpredictable conditions of the AD site,  
316 we considered it was important to explore rarity within the Archaea community.

317 By defining a “strictly rare” biosphere as the taxa with relative abundances below 0.01%, we  
318 found 50 archaeal OTUs. Within this group, 11 OTUs seem to be conditionally rare [67],  
319 maintaining their lower abundance in only one sampling time (the wet month), and reaching higher  
320 abundances in both dry samplings (Fig. 3A). Their dynamics lead us to speculate that those rare  
321 OTUs from the AD, along with the more abundant OTUs, could be benefiting of a saltier  
322 environment or drier conditions. In both cases, it is noticeable that although archaeal richness and  
323 overall abundance does not change much among samples, it is the rare (the one driven by

324 environmental fluctuations) biosphere that exhibits variations. A similar response to cold versus  
325 warm conditions have been noticed in other systems within CCB [37].

326         Among this rare biosphere, some taxa were found to be transiently rare (i.e., absent in one or  
327 two of the samples) comprising 39 OTUs (Fig. 3B). We suggest that this type of rarity should be  
328 driven at least in part by stochastic processes, such as passive dispersal of lineages temporarily  
329 recruited from microbial seed bank, or due to immigration [88]. As an example, nine rare  
330 unclassified taxa that were not present or were in very low abundances in the initial sample AD1,  
331 became abundant in February sample (dry season) (Fig. 3; Suppl. Fig. 2). More metagenomic  
332 studies are in their way to explore such pattern in a longer time frame.

333         It should not be discarded that the lowest-abundant taxa of AD could be undergoing  
334 dormancy, a mechanism that maintains cells alive, but inactive and intermittently below detection  
335 thresholds [89]. Indeed, Archaea can enter a cellular dormant state [89-91], thereby providing an  
336 adaptive response to what would otherwise be a deleterious environmental perturbation. This has  
337 been experimentally studied analyzing the thermoacidophile archaeon *Metallosphaera prunae* that  
338 produces VapC toxins that drive cellular dormancy under uranium stress [92]. Another factor for  
339 dormancy in Archaea is predatory organisms, specifically, virus, which are abundant in the AD  
340 metagenomes (~28%). As an example, a research group showed that rare and even inactive viruses,  
341 induce dormancy in the model archaeon *Sulfolobus islandicus* [90]. Also oligotrophy might be  
342 playing a role in Archaea dormancy, as dormant bacteria taxa have been found to be enriched in  
343 low phosphorus environment [89] and dormant microorganisms can also escape virus predation  
344 [93]. Considering the extremely skew stoichiometry, virus may be the drivers of the community  
345 structure, not only liberating immobilized nutrients to the system by lysing cells, but by maintaining  
346 a large panoply of rare taxa coexisting and avoiding predation.

347

### 348 ***4.3 Halophiles and methanogens Archaea in the AD***

349 Halophiles and methanogens species were highly abundant in the AD, representing > 50% of the  
350 total Archaeal diversity. The relationship between halophiles and methanogens is well known,  
351 sharing a common ancestral habitat [78, 82, 94, 95] and both groups are found in microbial mats  
352 and microbial communities associate to precipitated minerals (endoevaporites) [70]. The  
353 methanogens living in the aforementioned environments need a high level of NaCl (0.5 M) for  
354 optimal growth [96] and usually are halotolerant or halophilic [97]. This type of hypersaline  
355 environments is very dynamic and wide spread in the world [98].

356 In our sampling site, halophilic and methanogenic Archaea are proposed to constitute the  
357 stable core of the AD during hypersaline conditions under the salt crust. Accordingly, other studies  
358 indicate that salinity is the major abiotic factor that allows the shaping of microbial communities,  
359 especially in sediment surfaces, stromatolites, hydrothermal vents, hypersaline mats and anoxic  
360 saline water. These studies have demonstrated that saline sediments contain communities with  
361 higher unique biodiversity values in comparison with other environments [99]. Other studies  
362 demonstrate that changes in salinity, sulfate and availability of substrates could possibly stimulate  
363 the production of methane [70].

364 The most abundant OTUs in the analyzed AD metagenomes were similar to  
365 *Methanohalophilus mahii*, a halophilic-methanogen Archaea described as a non-marine  
366 methanogen, adapted to hypersaline environments; its metabolism requires 1.0-2.5 M NaCl for  
367 optimal growth and methanogenesis, using methanol and methylamines as substrates [95]. Other  
368 OTUs from AD were related to *Natrialba taiwanensis*, *Haloferax sulfurifontis*, *Methanoplanus*  
369 *petrolearius* and *Haloterrigena thermotolerans*. Halophilic and methanogen species coexisted  
370 within the microbial mat, along with some unexpected genera belonging to Euryarchaeota phylum.  
371 Among the latter we can find, *Thermococcus*, *Natronomonas*, *Picrophylus*, *Archaeoglobus*,



372 *Aciduliprofundum* and even *Thermoplasma*, a lineage that lacks a cell wall. These microorganisms  
373 are mostly reported from hydrothermal vents, displaying a high level of tolerance to low and high  
374 temperatures and a wide range of pH [100, 101]. The presence of these taxa along with the  
375 previous observations, adds evidence to our proposal stating that CCB microbial communities have  
376 both marine and magmatic affinities [30, 32]. Therefore, the Archaea that we observed in AD are  
377 witness of both environments, the deep aquifer propelled by magmatic heat within the mountain of  
378 San Marcos y Pinos [29], and the surface life, where photosynthesis occurs, rarely, after rainy days.  
379 Hence, part of the AD diversity might have emerged from the deep sediments that contained the  
380 mineral conditions of the ancient ocean [52].

381

#### 382 ***4.4 Thermophilic and other related Archaea lineages in the AD***

383 Summing to the hypothesis of magmatic influence to the microbial community of this unusual site,  
384 Crenarchaeota taxa are consistently present in the AD mat. These include thermophilic genera such  
385 as *Thermoproteus*, *Caldivirga*, *Ignicoccus*, *Sulfolobus*, *Pyrolobus*, among others. In addition,  
386 Thaumarchaeota members were detected, such as “*Candidatus Nitrososphaera gargensis*”,  
387 *Nitrosoarchaeum limnia*, and Marine Group 1 Thaumarchaeota. The presence of two OTUs were  
388 unexpected: *Cenarchaeum symbiosum*, a psychrophilic archaeon, previously reported as a symbiont  
389 of a several sponge species [102], and *Nitrosopumilus maritimus*, considered ubiquitous on  
390 oligotrophic oceans [103], another AD finding consistent with the marine signatures frequently  
391 found in CCB microbes [25, 28, 30, 44, 53]. The same occurs with “*Candidatus Korarchaeota*  
392 *cryptophilum*”, a representative of Korarchaeota phylum, its presence in AD is related to the marine  
393 origin of CCB and an incoming colonization of geothermal-terrestrial environments, a feature  
394 shared among the thermophiles [104].

395 Both Crenarchaeota and Thaumarchaeota have in general terms similar metabolic  
396 capabilities. PCR-amplified *amoA* genes from DNA of each sample (AD1, AD2, AD3; data not  
397 shown) provided evidence of ammonia oxidation capabilities as potential energy source and  
398 nitrification [105], suggesting a role for chemolithotrophy of these taxa in CCB, using a large  
399 panoply of organic compounds as well as CO<sub>2</sub>, iron, nitrogen and sulfur compounds as electron  
400 acceptors, as for instance methanobacteria (Euryarchaeota) and hyperthermophilic Crenarchaeota  
401 members use sulfur as an electron acceptor [106].

402 Other unexpected but interesting member of the phyla in the AD metagenomes were the  
403 Nanoarchaeota *Nanoarchaeum equitans*, a small-sized archaeon and an ectoparasitic relationship  
404 with the Crenarchaeota *Ignicoccus*, which was also detected in the sample [107]. Nanoarchaeota  
405 phylum has a widespread habitat distribution with diverse physicochemical features compatible  
406 with hot springs and other mesophilic hypersaline environments [108].

407

#### 408 ***5. Perspectives and conclusions.***

409 The Archaeal Domes microbial mats at the oasis Cuatro Ciénegas Basin, were recently discovered  
410 as a hypersaline extreme site. In these mats we uncovered through metagenomic analysis, one of  
411 the highest diversities registered so far in the Archaea domain, considering the site's geographic  
412 small scale. Most of the 230 OTUs observed in this unusual small shallow temporal pond, are part  
413 of the rare biosphere and form a stable core community. Within this core, we observed halophiles  
414 and methanogens, but also spatially unexpected archaeal taxa, that thrive under high salt  
415 concentrations. We also observed a transient rare biosphere that appears to be enriched under dry  
416 environmental conditions, suggesting seasonal dynamics shaping community assemblage.  
417 In order to explore this group of taxonomic the unclassified rare taxa more carefully, we are in the  
418 process of analyzing more metagenomes in different seasons as well as manipulating the

419 environment using mesocosms experiments. More sequencing effort in deep sediment cores will  
420 also help to look for the deep anaerobic biosphere, as well as eliminate blind spots in phylogeny of  
421 unclassified Archaea, and this will require differential coverage binning approach [109] using all  
422 available metagenomes from the AD to describe phylogenetic novelty within AD at CCB.

423 This highly diverse ecosystem within Cuatro Ciénegas, Mexico, arises as an attractive novel  
424 site for evolutionary, ecological, astrobiological and bioprospecting studies. The AD is, so far, the  
425 most diverse microbial community found in CCB, despite its extreme conditions. Since this area is  
426 being subjected to intense water exploitation by agricultural practices, and desiccation has become a  
427 common occurrence in numerous ponds, it is priority for our research group to keep investigating  
428 the ecology of the adaptation of this highly diverse archaeal-rich microbial communities to  
429 fluctuating temperature and rainfall conditions, while working with shareholders on changes in  
430 policy of water usage.

431 Now proven as an archaeal rich extreme site, CCB is once more attracting attention as an  
432 astrobiological model [38, 41]. The Archaean Domes not only can take us further back into the “lost  
433 world” but it is also a site that keeps providing evidences and new keys to understand how “life  
434 cycle” could have been originated on Earth, or (will be) possible on, for example, Mars.

435

#### 436 **Conflicts of interest**

437 The authors declare that there is no conflict of interest regarding the publication of this paper.

438

#### 439 **Acknowledgments**

440 We want to thank to Hamlet Aviles-Arnaut, Gabriel Moreno-Hagelsieb for their critical review of  
441 the manuscript. Also, thanks to Hamlet Avilés-Arnaut, Irene Ruvalcaba-Ortega and Ricardo  
442 Canales-Del Castillo for their valuable technical support and critical observations throughout the

443 project. Thanks to Kendra Rivera and Josué Corona for their technical help on the experiments.  
444 Finally, we thank SEMARNAT and APFF Cuatro Ciénegas for facilitating the sampling and in  
445 particular Rancho Pozas Azules, PRONATURA Noreste for access and permission to sample in the  
446 CCB Natural Protected Area.

447

448

#### 449 **Funding Statement**

450 We thank Universidad Autónoma de Nuevo León for funding field work through the PAICYT  
451 program granted to Susana De la Torre-Zavala during 2015. We thank the Alianza WWF-  
452 Fundación Carlos Slim fund to Valeria Souza and Luis E. Eguiarte.

453

454

455

456

457

#### 458 **References**

- 459 (1) B. J. Baker, J. H. Saw, A. E. Lind, et al., "Genomic inference of the metabolism of  
460 cosmopolitan subsurface Archaea, Hadesarchaea," *Nature Microbiology*, vol. 1, pp.  
461 16002, 2016.
- 462 (2) E. F. DeLong, "Everything in moderation: Archaea as 'non-extremophiles'," *Current*  
463 *Opinion in Genetics & Development*, vol. 8, no. 6, pp. 649-654, 1998.
- 464 (3) J.-C. Auguet, A. Barberan, E. O. Casamayor, "Global ecological patterns in uncultured  
465 Archaea," *The Isme Journal*, vol. 4, pp. 182, 2009.
- 466 (4) B. Chaban, S. Y. Ng, K. F. Jarrell, "Archaeal habitats--from the extreme to the ordinary,"  
467 *Can J Microbiol*, vol. 52, no. 2, pp. 73-116, 2006.
- 468 (5) M. J. Church, E. F. DeLong, H. W. Ducklow, et al., "Abundance and distribution of  
469 planktonic Archaea and Bacteria in the waters west of the Antarctic Peninsula,"  
470 *Limnology and Oceanography*, vol. 48, no. 5, pp. 1893-1902, 2003.

- 471 (6) M. A. Martinez-Olivas, N. G. Jimenez-Bueno, J. A. Hernandez-Garcia, et al., "Bacterial and  
472 archaeal spatial distribution and its environmental drivers in an extremely  
473 haloalkaline soil at the landscape scale," *PeerJ*, vol. 7, pp. e6127, 2019.
- 474 (7) Y. Chen, Y. Liu, X. Wang, "Spatiotemporal variation of bacterial and archaeal  
475 communities in sediments of a drinking reservoir, Beijing, China," *Appl Microbiol  
476 Biotechnol*, vol. 101, no. 8, pp. 3379-3391, 2017.
- 477 (8) L. A. Hug, B. J. Baker, K. Anantharaman, et al., "A new view of the tree of life," *Nature  
478 Microbiology*, vol. 1, pp. 16048, 2016.
- 479 (9) S. Kato, S. Nakano, M. Kouduka, et al., "Metabolic Potential of As-yet-uncultured  
480 Archaeal Lineages of Candidatus Hydrothermarchaeota Thriving in Deep-sea Metal  
481 Sulfide Deposits," *Microbes Environ*, 2019.
- 482 (10) J. M. Huang, B. J. Baker, J. T. Li, Y. Wang, "New Microbial Lineages Capable of Carbon  
483 Fixation and Nutrient Cycling in Deep-Sea Sediments of the Northern South China Sea,"  
484 *Appl Environ Microbiol*, vol. 85, no. 15, 2019.
- 485 (11) K. G. Lloyd, A. D. Steen, J. Ladau, J. Yin, L. Crosby, "Phylogenetically Novel Uncultured  
486 Microbial Cells Dominate Earth Microbiomes," *mSystems*, vol. 3, no. 5, 2018.
- 487 (12) H. Imachi, M. K. Nobu, N. Nakahara, et al., "Isolation of an archaeon at the prokaryote-  
488 eukaryote interface," *bioRxiv*, pp. 726976, 2019.
- 489 (13) C. Petitjean, P. Deschamps, P. López-García, D. Moreira, C. Brochier-Armanet,  
490 "Extending the Conserved Phylogenetic Core of Archaea Disentangles the Evolution of  
491 the Third Domain of Life," *Molecular Biology and Evolution*, vol. 32, no. 5, pp. 1242-  
492 1254, 2015.
- 493 (14) P. S. Adam, G. Borrel, C. Brochier-Armanet, S. Gribaldo, "The growing tree of Archaea:  
494 new perspectives on their diversity, evolution and ecology," *The Isme Journal*, vol. 11,  
495 pp. 2407, 2017.
- 496 (15) C. Bräsen, D. Esser, B. Rauch, B. Siebers, "Carbohydrate metabolism in Archaea: current  
497 insights into unusual enzymes and pathways and their regulation," *Microbiology and  
498 molecular biology reviews : MMBR*, vol. 78, no. 1, pp. 89-175, 2014.
- 499 (16) S. Thor, J. R. Peterson, Z. Luthey-Schulten, "Genome-Scale Metabolic Modeling of  
500 Archaea Lends Insight into Diversity of Metabolic Function," *Archaea*, vol. 2017, pp.  
501 9763848, 2017.
- 502 (17) J. J. Elser, J. H. Schampel, F. Garcia-Pichel, et al., "Effects of phosphorus enrichment and  
503 grazing snails on modern stromatolitic microbial communities," *Freshwater Biology*,  
504 vol. 50, no. 11, pp. 1808-1825, 2005.
- 505 (18) J. J. Elser, J. Watts, J. H. Schampel, J. Farmer, "Early Cambrian food webs on a trophic  
506 knife-edge? A hypothesis and preliminary data from a modern stromatolite-based  
507 ecosystem," *Ecology Letters*, vol. 9, no. 3, pp. 295-303, 2006.
- 508 (19) V. Souza, L. E. Eguiarte, J. Siefert, J. J. Elser, "Microbial endemism: does phosphorus  
509 limitation enhance speciation?," *Nat Rev Microbiol*, vol. 6, no. 7, pp. 559-564, 2008.
- 510 (20) J. Elser, J. Okie, Z. Lee, V. Souza, "The Effect of Nutrients and N:P Ratio on Microbial  
511 Communities: Testing the Growth Rate Hypothesis and Its Extensions in Lagunita Pond  
512 (Churince)," in *Ecosystem Ecology and Geochemistry of Cuatro Ciénegas: How to Survive  
513 in an Extremely Oligotrophic Site*, F. García-Oliva, J. Elser and V. Souza, Eds., pp. 31-41,  
514 Springer International Publishing, 2018.
- 515 (21) V. Souza, A. Moreno-Letelier, M. Travisano, et al., "The lost world of Cuatro Ciénegas  
516 Basin, a relictual bacterial niche in a desert oasis," *Elife*, vol. 7, 2018.

- 517 (22) W. L. Minckley, *Environments of the Bolson of Cuatro Ciénegas, Coahuila, Mexico.*, Texas  
518 Western Press, THE UNIVERSITY OF TEXAS AT EL PASO 1969.
- 519 (23) V. Souza, L. E. Eguiarte, J. J. Elser, M. Travisano, G. Olmedo-Álvarez, "A Microbial Saga:  
520 How to Study an Unexpected Hot Spot of Microbial Biodiversity from Scratch?," in  
521 *Cuatro Ciénegas Ecology, Natural History and Microbiology*, V. Souza, G. Olmedo-Álvarez  
522 and L. E. Eguiarte, Eds., pp. 1-20, Springer International Publishing, 2018.
- 523 (24) V. De Anda, I. Zapata-Peñasco, L. E. Eguiarte, V. Souza, "Toward a Comprehensive  
524 Understanding of Environmental Perturbations in Microbial Mats from the Cuatro  
525 Ciénegas Basin by Network Inference," in *Ecosystem Ecology and Geochemistry of  
526 Cuatro Ciénegas: How to Survive in an Extremely Oligotrophic Site*, F. García-Oliva, J.  
527 Elser and V. Souza, Eds., pp. 85-97, Springer International Publishing, 2018.
- 528 (25) H. F. Arocha-Garza, R. Canales-Del Castillo, L. E. Eguiarte, V. Souza, S. De la Torre-  
529 Zavala, "High diversity and suggested endemism of culturable Actinobacteria in an  
530 extremely oligotrophic desert oasis," *PeerJ*, vol. 5, pp. e3247, 2017.
- 531 (26) Z. Gomez-Lunar, M. Vázquez-Rosas-Landa, G. Y. Ponce-Soto, et al., "How Divergent Is  
532 the Cuatro Ciénegas Oasis? Genomic Studies of Microbial Populations and Niche  
533 Differentiation," in *Cuatro Ciénegas Ecology, Natural History and Microbiology*, V. Souza,  
534 G. Olmedo-Álvarez and L. E. Eguiarte, Eds., pp. 57-71, Springer International Publishing,  
535 2018.
- 536 (27) P. Velez, J. Gasca-Pineda, E. Rosique-Gil, et al., "Microfungal oasis in an oligotrophic  
537 desert: diversity patterns and community structure in three freshwater systems of  
538 Cuatro Ciénegas, Mexico," *PeerJ*, vol. 4, pp. e2064, 2016.
- 539 (28) B. Taboada, P. Isa, A. L. Gutierrez-Escolano, et al., "The Geographic Structure of Viruses  
540 in the Cuatro Ciénegas Basin, a Unique Oasis in Northern Mexico, Reveals a Highly  
541 Diverse Population on a Small Geographic Scale," *Appl Environ Microbiol*, vol. 84, no. 11,  
542 2018.
- 543 (29) B. D. Wolaver, L. J. Crossey, K. E. Karlstrom, et al., "Identifying origins of and pathways  
544 for spring waters in a semiarid basin using He, Sr, and C isotopes: Cuatrociénegas  
545 Basin, Mexico," *Geosphere*, vol. 9, no. 1, pp. 113-125, 2013.
- 546 (30) A. Moreno-Letelier, G. Olmedo-Alvarez, L. E. Eguiarte, V. Souza, "Divergence and  
547 phylogeny of Firmicutes from the Cuatro Ciénegas Basin, Mexico: a window to an  
548 ancient ocean," *Astrobiology*, vol. 12, no. 7, pp. 674-684, 2012.
- 549 (31) C. Desnues, B. Rodriguez-Brito, S. Rayhawk, et al., "Biodiversity and biogeography of  
550 phages in modern stromatolites and thrombolites," *Nature*, vol. 452, no. 7185, pp. 340-  
551 343, 2008.
- 552 (32) V. Souza, A. Moreno-Letelier, M. Travisano, et al., "The lost world of Cuatro Ciénegas  
553 Basin, a relictual bacterial niche in a desert oasis," *eLife*, vol. 7, pp. e38278, 2018.
- 554 (33) M. Peimbert, L. D. Alcaraz, G. Bonilla-Rosso, et al., "Comparative metagenomics of two  
555 microbial mats at Cuatro Ciénegas Basin I: ancient lessons on how to cope with an  
556 environment under severe nutrient stress," *Astrobiology*, vol. 12, no. 7, pp. 648-658,  
557 2012.
- 558 (34) G. Bonilla-Rosso, M. Peimbert, L. D. Alcaraz, et al., "Comparative metagenomics of two  
559 microbial mats at Cuatro Ciénegas Basin II: community structure and composition in  
560 oligotrophic environments," *Astrobiology*, vol. 12, no. 7, pp. 659-673, 2012.

- 561 (35) V. Souza, L. Espinosa-Asuar, A. E. Escalante, et al., "An endangered oasis of aquatic  
562 microbial biodiversity in the Chihuahuan desert," *Proc Natl Acad Sci U S A*, vol. 103, no.  
563 17, pp. 6565-6570, 2006.
- 564 (36) B. M. Winsborough, E. Theriot, D. B. Czarnecki, "Diatoms on a continental "island":  
565 Lazarus species, marine disjuncts and other endemic diatoms of the Cuatro Ciénegas  
566 basin, Coahuila, Mexico.," *Nova Hedwigia, Suppl*, vol. 135, pp. 257-274, 2009.
- 567 (37) A. Rodriguez-Verdugo, V. Souza, L. E. Eguiarte, A. E. Escalante, "Diversity across  
568 Seasons of Culturable Pseudomonas from a Desiccation Lagoon in Cuatro Ciénegas,  
569 Mexico," *Int J Microbiol*, vol. 2012, pp. 201389, 2012.
- 570 (38) V. Souza, J. L. Siefert, A. E. Escalante, J. J. Elser, L. E. Eguiarte, "The Cuatro Ciénegas  
571 Basin in Coahuila, Mexico: an astrobiological Precambrian Park," *Astrobiology*, vol. 12,  
572 no. 7, pp. 641-647, 2012.
- 573 (39) V. Souza, L. E. Eguiarte, M. Travisano, et al., "Travel, sex, and food: what's speciation got  
574 to do with it?," *Astrobiology*, vol. 12, no. 7, pp. 634-640, 2012.
- 575 (40) E. A. Rebolgar, M. Avitia, L. E. Eguiarte, et al., "Water-sediment niche differentiation in  
576 ancient marine lineages of Exiguobacterium endemic to the Cuatro Ciénegas Basin,"  
577 *Environ Microbiol*, vol. 14, no. 9, pp. 2323-2333, 2012.
- 578 (41) N. E. Lopez-Lozano, L. E. Eguiarte, G. Bonilla-Rosso, et al., "Bacterial communities and  
579 the nitrogen cycle in the gypsum soils of Cuatro Ciénegas Basin, coahuila: a Mars  
580 analogue," *Astrobiology*, vol. 12, no. 7, pp. 699-709, 2012.
- 581 (42) S. Pajares, L. E. Eguiarte, G. Bonilla-Rosso, V. Souza, "Drastic changes in aquatic  
582 bacterial populations from the Cuatro Ciénegas Basin (Mexico) in response to long-  
583 term environmental stress," *Antonie Van Leeuwenhoek*, vol. 104, no. 6, pp. 1159-1175,  
584 2013.
- 585 (43) S. Pajares, A. E. Escalante, A. M. Noguez, et al., "Spatial heterogeneity of  
586 physicochemical properties explains differences in microbial composition in arid soils  
587 from Cuatro Ciénegas, Mexico," *PeerJ*, vol. 4, pp. e2459, 2016.
- 588 (44) L. D. Alcaraz, G. Olmedo, G. Bonilla, et al., "The genome of *Bacillus coahuilensis* reveals  
589 adaptations essential for survival in the relic of an ancient marine environment," *Proc  
590 Natl Acad Sci U S A*, vol. 105, no. 15, pp. 5803-5808, 2008.
- 591 (45) J. Toribio, A. E. Escalante, J. Caballero-Mellado, et al., "Characterization of a novel  
592 biosurfactant producing *Pseudomonas koreensis* lineage that is endemic to Cuatro  
593 Ciénegas Basin," *Syst Appl Microbiol*, vol. 34, no. 7, pp. 531-535, 2011.
- 594 (46) N. E. Lopez-Lozano, K. B. Heidelberg, W. C. Nelson, et al., "Microbial secondary  
595 succession in soil microcosms of a desert oasis in the Cuatro Ciénegas Basin, Mexico,"  
596 *PeerJ*, vol. 1, pp. e47, 2013.
- 597 (47) G. Y. Ponce-Soto, E. Aguirre-von-Wobeser, L. E. Eguiarte, et al., "Enrichment experiment  
598 changes microbial interactions in an ultra-oligotrophic environment," *Front Microbiol*,  
599 vol. 6, pp. 246, 2015.
- 600 (48) J. A. Valdivia-Anistro, L. E. Eguiarte-Frums, G. Delgado-Sapien, et al., "Variability of rRNA  
601 Operon Copy Number and Growth Rate Dynamics of *Bacillus* Isolated from an  
602 Extremely Oligotrophic Aquatic Ecosystem," *Front Microbiol*, vol. 6, pp. 1486, 2015.
- 603 (49) N. J. Felstead, M. J. Leng, S. E. Metcalfe, S. Gonzalez, "Understanding the hydrogeology  
604 and surface flow in the Cuatrociénegas Basin (NE Mexico) using stable isotopes,"  
605 *Journal of Arid Environments*, vol. 121, pp. 15-23, 2015.

- 606 (50) M. D. Rodriguez-Torres, A. Islas-Robles, Z. Gomez-Lunar, et al., "Phenotypic  
607 Microdiversity and Phylogenetic Signal Analysis of Traits Related to Social Interaction  
608 in *Bacillus* spp. from Sediment Communities," *Front Microbiol*, vol. 8, pp. 29, 2017.
- 609 (51) Z. M. Lee, A. T. Poret-Peterson, J. L. Siefert, et al., "Nutrient Stoichiometry Shapes  
610 Microbial Community Structure in an Evaporitic Shallow Pond," *Front Microbiol*, vol. 8,  
611 pp. 949, 2017.
- 612 (52) V. Souza, L. E. Eguiarte, "In the Beginning, There Was Fire: Cuatro Ciénegas Basin (CCB)  
613 and the Long History of Life on Earth," in *Cuatro Ciénegas Ecology, Natural History and  
614 Microbiology*, V. Souza, G. Olmedo-Álvarez and L. E. Eguiarte, Eds., pp. 21-33, Springer  
615 International Publishing, 2018.
- 616 (53) T. Aguirrezabala-Campano, O. Gerardo-Nieto, R. Gonzalez-Valencia, V. Souza, F.  
617 Thalasso, "Methane dynamics in the subsaline ponds of the Chihuahuan Desert: A first  
618 assessment," *Sci Total Environ*, vol. 666, pp. 1255-1264, 2019.
- 619 (54) K. J. Purdy, T. M. Embley, S. Takii, D. B. Nedwell, "Rapid Extraction of DNA and rRNA  
620 from Sediments by a Novel Hydroxyapatite Spin-Column Method," *Appl Environ  
621 Microbiol*, vol. 62, no. 10, pp. 3905-3907, 1996.
- 622 (55) A. M. Bolger, M. Lohse, B. Usadel, "Trimmomatic: a flexible trimmer for Illumina  
623 sequence data," *Bioinformatics*, vol. 30, no. 15, pp. 2114-2120, 2014.
- 624 (56) J. Zhang, K. Kobert, T. Flouri, A. Stamatakis, "PEAR: a fast and accurate Illumina Paired-  
625 End reAd mergeR," *Bioinformatics*, vol. 30, no. 5, pp. 614-620, 2014.
- 626 (57) N. Segata, L. Waldron, A. Ballarini, et al., "Metagenomic microbial community profiling  
627 using unique clade-specific marker genes," *Nat Methods*, vol. 9, no. 8, pp. 811-814,  
628 2012.
- 629 (58) R. K. Colwell, J. E. Elsensohn, "EstimateS turns 20: statistical estimation of species  
630 richness and shared species from samples, with non-parametric extrapolation,"  
631 *Ecography*, vol. 37, no. 6, pp. 609-613, 2014.
- 632 (59) Ø. Hammer, D. A. Harper, P. D. Ryan, "PAST: paleontological statistics software package  
633 for education and data analysis," *Palaeontologia electronica*, vol. 4, no. 1, pp. 9, 2001.
- 634 (60) D. G. Higgins, "CLUSTAL V: multiple alignment of DNA and protein sequences," *Methods  
635 Mol Biol*, vol. 25, pp. 307-318, 1994.
- 636 (61) S. Kumar, G. Stecher, K. Tamura, "MEGA7: Molecular Evolutionary Genetics Analysis  
637 Version 7.0 for Bigger Datasets," *Mol Biol Evol*, vol. 33, no. 7, pp. 1870-1874, 2016.
- 638 (62) C. M. Centeno, P. Legendre, Y. Beltran, et al., "Microbialite genetic diversity and  
639 composition relate to environmental variables," *FEMS Microbiol Ecol*, vol. 82, no. 3, pp.  
640 724-735, 2012.
- 641 (63) L. Espinosa-Asuar, A. E. Escalante, J. Gasca-Pineda, et al., "Aquatic bacterial assemblage  
642 structure in Pozas Azules, Cuatro Cienegas Basin, Mexico: Deterministic vs. stochastic  
643 processes," *Int Microbiol*, vol. 18, no. 2, pp. 105-115, 2015.
- 644 (64) H. L. Wong, A. Ahmed-Cox, B. P. Burns, "Molecular Ecology of Hypersaline Microbial  
645 Mats: Current Insights and New Directions," *Microorganisms*, vol. 4, no. 1, 2016.
- 646 (65) N. E. López-Lozano, S. Pajares, A. E. Escalante, et al., "Microcosms and Mesocosms: A  
647 Way to Test the Resilience of Microbial Communities in Cuatro Ciénegas," in *Cuatro  
648 Ciénegas Ecology, Natural History and Microbiology*, V. Souza, G. Olmedo-Álvarez and L.  
649 E. Eguiarte, Eds., pp. 83-102, Springer International Publishing, 2018.
- 650 (66) X. Jia, F. Dini-Andreote, J. Falcao Salles, "Community Assembly Processes of the  
651 Microbial Rare Biosphere," *Trends Microbiol*, vol. 26, no. 9, pp. 738-747, 2018.



- 652 (67) A. Shade, S. E. Jones, J. G. Caporaso, et al., "Conditionally rare taxa disproportionately  
653 contribute to temporal changes in microbial diversity," *MBio*, vol. 5, no. 4, pp. e01371-  
654 01314, 2014.
- 655 (68) A. Shade, P. S. McManus, J. Handelsman, "Unexpected diversity during community  
656 succession in the apple flower microbiome," *MBio*, vol. 4, no. 2, 2013.
- 657 (69) A. B. Fernandez, M. C. Rasuk, P. T. Visscher, et al., "Microbial Diversity in Sediment  
658 Ecosystems (Evaporites Domes, Microbial Mats, and Crusts) of Hypersaline Laguna  
659 Tebenquiche, Salar de Atacama, Chile," *Front Microbiol*, vol. 7, pp. 1284, 2016.
- 660 (70) J. Q. Garcia-Maldonado, A. Escobar-Zepeda, L. Raggi, et al., "Bacterial and archaeal  
661 profiling of hypersaline microbial mats and endoevaporites, under natural conditions  
662 and methanogenic microcosm experiments," *Extremophiles*, vol. 22, no. 6, pp. 903-916,  
663 2018.
- 664 (71) J. Babilonia, A. Conesa, G. Casaburi, et al., "Comparative Metagenomics Provides Insight  
665 Into the Ecosystem Functioning of the Shark Bay Stromatolites, Western Australia,"  
666 *Front Microbiol*, vol. 9, pp. 1359, 2018.
- 667 (72) T. M. Lenton, S. J. Daines, "Matworld - the biogeochemical effects of early life on land,"  
668 *New Phytol*, vol. 215, no. 2, pp. 531-537, 2017.
- 669 (73) N. H. Sleep, "The Hadean-Archaeon environment," *Cold Spring Harb Perspect Biol*, vol. 2,  
670 no. 6, pp. a002527, 2010.
- 671 (74) R. Cerritos, L. E. Eguiarte, M. Avitia, et al., "Diversity of culturable thermo-resistant  
672 aquatic bacteria along an environmental gradient in Cuatro Ciénegas, Coahuila,  
673 Mexico," *Antonie Van Leeuwenhoek*, vol. 99, no. 2, pp. 303-318, 2011.
- 674 (75) M. Tessler, J. S. Neumann, E. Afshinnikoo, et al., "Large-scale differences in microbial  
675 biodiversity discovery between 16S amplicon and shotgun sequencing," *Sci Rep*, vol. 7,  
676 no. 1, pp. 6589, 2017.
- 677 (76) D. Papineau, J. J. Walker, S. J. Mojzsis, N. R. Pace, "Composition and structure of  
678 microbial communities from stromatolites of Hamelin Pool in Shark Bay, Western  
679 Australia," *Appl Environ Microbiol*, vol. 71, no. 8, pp. 4822-4832, 2005.
- 680 (77) M. Berlanga, M. Palau, R. Guerrero, "Functional Stability and Community Dynamics  
681 during Spring and Autumn Seasons Over 3 Years in Camargue Microbial Mats," *Front*  
682 *Microbiol*, vol. 8, pp. 2619, 2017.
- 683 (78) C. E. Robertson, J. R. Spear, J. K. Harris, N. R. Pace, "Diversity and stratification of  
684 archaea in a hypersaline microbial mat," *Appl Environ Microbiol*, vol. 75, no. 7, pp.  
685 1801-1810, 2009.
- 686 (79) A. Saghai, A. Gutierrez-Preciado, P. Deschamps, et al., "Unveiling microbial interactions  
687 in stratified mat communities from a warm saline shallow pond," *Environ Microbiol*,  
688 vol. 19, no. 6, pp. 2405-2421, 2017.
- 689 (80) M. E. Farias, M. C. Rasuk, K. L. Gallagher, et al., "Prokaryotic diversity and  
690 biogeochemical characteristics of benthic microbial ecosystems at La Brava, a  
691 hypersaline lake at Salar de Atacama, Chile," *PLoS One*, vol. 12, no. 11, pp. e0186867,  
692 2017.
- 693 (81) A. Moreno-Letelier, G. Olmedo, L. E. Eguiarte, L. Martinez-Castilla, V. Souza, "Parallel  
694 Evolution and Horizontal Gene Transfer of the *pst* Operon in Firmicutes from  
695 Oligotrophic Environments," *Int J Evol Biol*, vol. 2011, pp. 781642, 2011.
- 696 (82) D. L. Valentine, "Adaptations to energy stress dictate the ecology and evolution of the  
697 Archaea," *Nat Rev Microbiol*, vol. 5, no. 4, pp. 316-323, 2007.

- 698 (83) S. Yachi, M. Loreau, "Biodiversity and ecosystem productivity in a fluctuating  
699 environment: the insurance hypothesis," *Proc Natl Acad Sci U S A*, vol. 96, no. 4, pp.  
700 1463-1468, 1999.
- 701 (84) C. Winter, T. Bouvier, M. G. Weinbauer, T. F. Thingstad, "Trade-offs between  
702 competition and defense specialists among unicellular planktonic organisms: the  
703 "killing the winner" hypothesis revisited," *Microbiol Mol Biol Rev*, vol. 74, no. 1, pp. 42-  
704 57, 2010.
- 705 (85) J. Hwang, S. Y. Park, M. Park, S. Lee, T. K. Lee, "Seasonal Dynamics and Metagenomic  
706 Characterization of Marine Viruses in Goseong Bay, Korea," *PLoS One*, vol. 12, no. 1, pp.  
707 e0169841, 2017.
- 708 (86) C. Corinaldesi, M. Tangherlini, A. Dell'Anno, "From virus isolation to metagenome  
709 generation for investigating viral diversity in deep-sea sediments," *Sci Rep*, vol. 7, no. 1,  
710 pp. 8355, 2017.
- 711 (87) S. Coveley, M. S. Elshahed, N. H. Youssef, "Response of the rare biosphere to  
712 environmental stressors in a highly diverse ecosystem (Zodletone spring, OK, USA)," *PeerJ*,  
713 vol. 3, pp. e1182, 2015.
- 714 (88) M. D. Lynch, J. D. Neufeld, "Ecology and exploration of the rare biosphere," *Nat Rev*  
715 *Microbiol*, vol. 13, no. 4, pp. 217-229, 2015.
- 716 (89) S. E. Jones, J. T. Lennon, "Dormancy contributes to the maintenance of microbial  
717 diversity," *Proc Natl Acad Sci U S A*, vol. 107, no. 13, pp. 5881-5886, 2010.
- 718 (90) M. A. Bautista, C. Zhang, R. J. Whitaker, "Virus-induced dormancy in the archaeon  
719 *Sulfolobus islandicus*," *MBio*, vol. 6, no. 2, 2015.
- 720 (91) H. Gulbudak, J. S. Weitz, "A touch of sleep: biophysical model of contact-mediated  
721 dormancy of archaea by viruses," *Proceedings. Biological sciences*, vol. 283, no. 1839,  
722 pp. 20161037, 2016.
- 723 (92) A. Mukherjee, G. H. Wheaton, J. A. Counts, et al., "VapC toxins drive cellular dormancy  
724 under uranium stress for the extreme thermoacidophile *Metallosphaera prunae*,"  
725 *Environ Microbiol*, vol. 19, no. 7, pp. 2831-2842, 2017.
- 726 (93) L. Fernandez, A. Rodriguez, P. Garcia, "Phage or foe: an insight into the impact of viral  
727 predation on microbial communities," *ISME J*, vol. 12, no. 5, pp. 1171-1179, 2018.
- 728 (94) M. F. Edbeib, R. A. Wahab, F. Huyop, "Halophiles: biology, adaptation, and their role in  
729 decontamination of hypersaline environments," *World J Microbiol Biotechnol*, vol. 32,  
730 no. 8, pp. 135, 2016.
- 731 (95) S. Spring, C. Scheuner, A. Lapidus, et al., "The genome sequence of *Methanohalophilus*  
732 *mahii* SLP(T) reveals differences in the energy metabolism among members of the  
733 *Methanosarcinaceae* inhabiting freshwater and saline environments," *Archaea*, vol.  
734 2010, pp. 690737, 2010.
- 735 (96) W. J. Jones, D. P. Nagle, Jr., W. B. Whitman, "Methanogens and the diversity of  
736 archaeobacteria," *Microbiol Rev*, vol. 51, no. 1, pp. 135-177, 1987.
- 737 (97) D. R. Boone, W. B. Whitman, P. Rouvière, "Diversity and Taxonomy of Methanogens," in  
738 *Methanogenesis: Ecology, Physiology, Biochemistry & Genetics*, J. G. Ferry, Ed., pp. 35-80,  
739 Springer US, 1993.
- 740 (98) J. C. Vogt, R. M. M. Abed, D. C. Albach, K. A. Palinska, "Bacterial and Archaeal Diversity in  
741 Hypersaline Cyanobacterial Mats Along a Transect in the Intertidal Flats of the  
742 Sultanate of Oman," *Microb Ecol*, vol. 75, no. 2, pp. 331-347, 2018.

- 743 (99) J. Yang, L. Ma, H. Jiang, G. Wu, H. Dong, "Salinity shapes microbial diversity and  
744 community structure in surface sediments of the Qinghai-Tibetan Lakes," *Sci Rep*, vol.  
745 6, pp. 25078, 2016.
- 746 (100) R. E. Anderson, M. L. Sogin, J. A. Baross, "Biogeography and ecology of the rare and  
747 abundant microbial lineages in deep-sea hydrothermal vents," *FEMS Microbiol Ecol*, vol.  
748 91, no. 1, pp. 1-11, 2015.
- 749 (101) K. Takai, K. Horikoshi, "Genetic diversity of archaea in deep-sea hydrothermal vent  
750 environments," *Genetics*, vol. 152, no. 4, pp. 1285-1297, 1999.
- 751 (102) S. J. Hallam, K. T. Konstantinidis, N. Putnam, et al., "Genomic analysis of the uncultivated  
752 marine crenarchaeote *Cenarchaeum symbiosum*," *Proc Natl Acad Sci U S A*, vol. 103, no.  
753 48, pp. 18296-18301, 2006.
- 754 (103) W. W. Metcalf, B. M. Griffin, R. M. Cicchillo, et al., "Synthesis of methylphosphonic acid  
755 by marine microbes: a source for methane in the aerobic ocean," *Science*, vol. 337, no.  
756 6098, pp. 1104-1107, 2012.
- 757 (104) R. L. Miller-Coleman, J. A. Dodsworth, C. A. Ross, et al., "Korarchaeota diversity,  
758 biogeography, and abundance in Yellowstone and Great Basin hot springs and  
759 ecological niche modeling based on machine learning," *PLoS One*, vol. 7, no. 5, pp.  
760 e35964, 2012.
- 761 (105) M. Pester, C. Schleper, M. Wagner, "The Thaumarchaeota: an emerging view of their  
762 phylogeny and ecophysiology," *Curr Opin Microbiol*, vol. 14, no. 3, pp. 300-306, 2011.
- 763 (106) Y. Liu, L. L. Beer, W. B. Whitman, "Sulfur metabolism in archaea reveals novel  
764 processes," *Environ Microbiol*, vol. 14, no. 10, pp. 2632-2644, 2012.
- 765 (107) P. Forterre, S. Gribaldo, C. Brochier-Armanet, "Happy together: genomic insights into  
766 the unique Nanoarchaeum/Ignicoccus association," *J Biol*, vol. 8, no. 1, pp. 7, 2009.
- 767 (108) A. Casanueva, N. Galada, G. C. Baker, et al., "Nanoarchaeal 16S rRNA gene sequences are  
768 widely dispersed in hyperthermophilic and mesophilic halophilic environments,"  
769 *Extremophiles*, vol. 12, no. 5, pp. 651-656, 2008.
- 770 (109) M. Albertsen, P. Hugenholtz, A. Skarszewski, et al., "Genome sequences of rare,  
771 uncultured bacteria obtained by differential coverage binning of multiple  
772 metagenomes," *Nat Biotechnol*, vol. 31, no. 6, pp. 533-538, 2013.
- 773

774

775

776

777

778

779

780

781

782

783

784

785 **Table 1. Physicochemical parameters and Archaeal abundance in four Hypersaline Microbial**

786 **Mats.**

787

788

| Microbial Mat          | Salinity % | Temperature C° | pH   | Archaea relative abundance % | Archaeal OTU's (97%) | Sequencing approach                          | Reference                             |
|------------------------|------------|----------------|------|------------------------------|----------------------|----------------------------------------------|---------------------------------------|
| Archaeal Domes         | 53%        | 31.45          | 9.94 | 4.96%                        | 230                  | Whole Genome-Shot Gun Illumina MiSeq         | This study                            |
| Guerrero Negro, Mexico | 28%        | 30             | N/A  | 30.45%                       | 209                  | 16s rRNA Tag (926F/1392R) FLX Titanium Roche | García-Maldonado <i>et al.</i> , 2018 |
| Shark Bay, Australia   | 6.8%       | 24.8           | 8.13 | <1%                          | 13                   | Whole Genome-Shot Gun (Illumina MySeq)       | Babilonia <i>et al.</i> 2018          |
| Atacama, Chile         | 10.6-15%   | 23-27          | 7.65 | 50-66%                       | 121                  | 16s rRNA Tag (F515/R806) 454 pyrosequencing  | Fernandez <i>et al.</i> 2016          |

789

790

791

792

793

794

795

796

797

798

799

800

801 **Table 2. Diversity indexes of the Archaean Dome Metagenomes.** a) Alpha and b) beta estimator

802 indexes for specific Archaea diversity.

803

| <b>AD Metagenome Samples</b>        |                |                |                |
|-------------------------------------|----------------|----------------|----------------|
| <b>a) Alpha diversity indicator</b> | <b>AD1</b>     | <b>AD2</b>     | <b>AD3</b>     |
| Shannon <sup>mean</sup>             | 5.33           | 5.38           | 5.3            |
| Simpson Inv <sup>mean</sup>         | 207.3          | 214.17         | 216.38         |
| Observed OTU's                      | 222            | 200            | 200            |
| Chao Taxa number                    | 207.3          | 221.57         | 254.61         |
| <b>b) Beta diversity Index</b>      | <b>AD1-AD2</b> | <b>AD1-AD3</b> | <b>AD2-AD3</b> |
| Bray-Curtis                         | 0.69           | 0.71           | 0.84           |

804

805

806

A

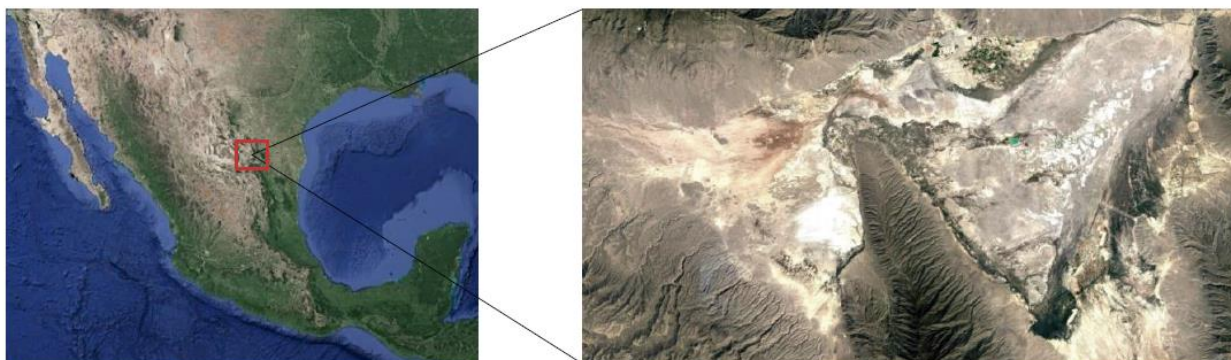

B

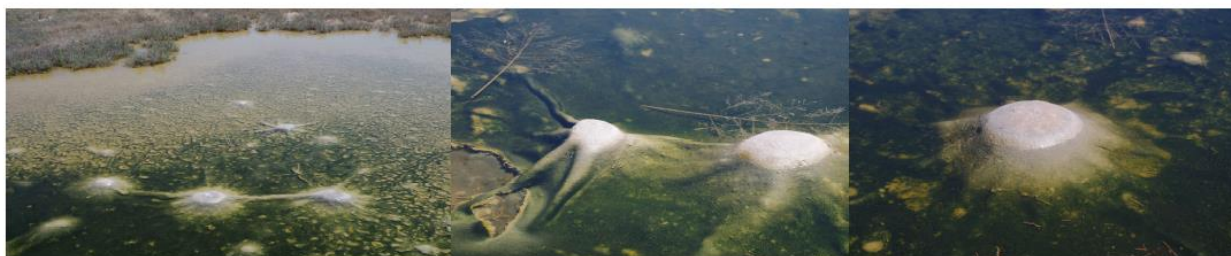

C

AD1 (Apr.-2016)

AD2 (Sept.-2016)

AD3 (Feb.-2017)

WATER LEVEL

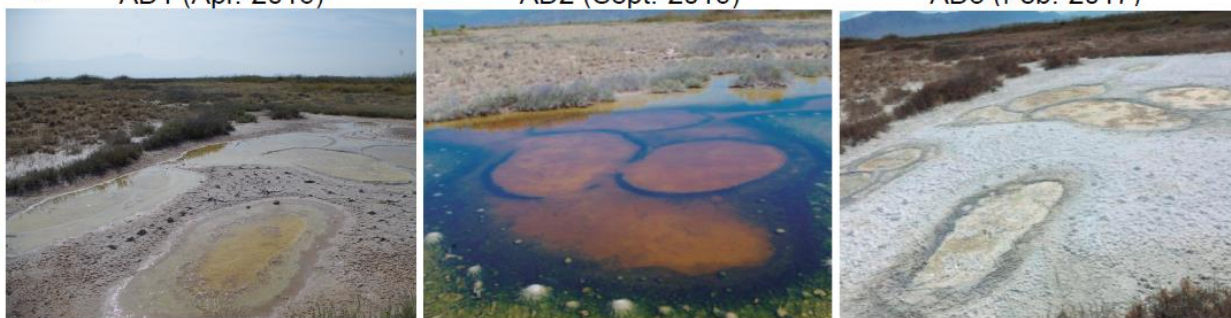

CORTEX

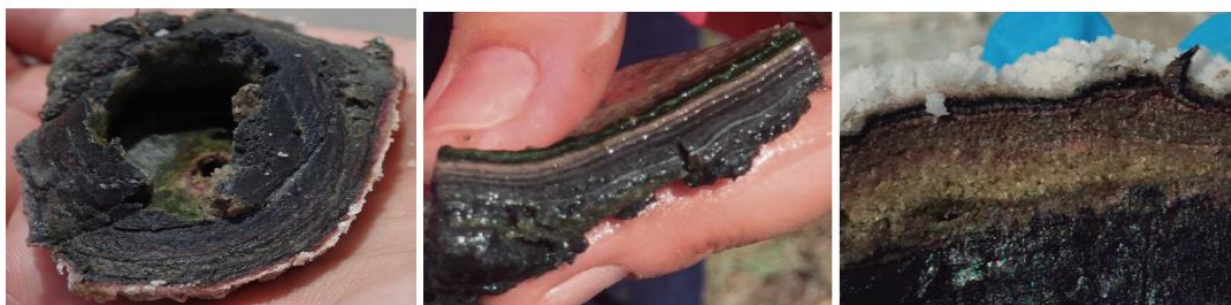

807

808

809 **Figure 1. Sampling site Map.** A) Cuatro Cienegas, Coahuila location within Mexico; B) Archaeal  
810 Domes (AD) mats with unusual and flexible bubble-containing superficial layer found in Pozas  
811 Azules Ranch within Chihuahuan Desert region C) AD sampling of the three continuous seasons:  
812 AD1 (April 2016), AD2 (September 2016), AD3 (February 2017) showing their obtained microbial  
813 mat and the structure of microbial community in in its respective season.

814

815

816

817

818

819

820

821

822

823

824

825

826

827

828

829

830

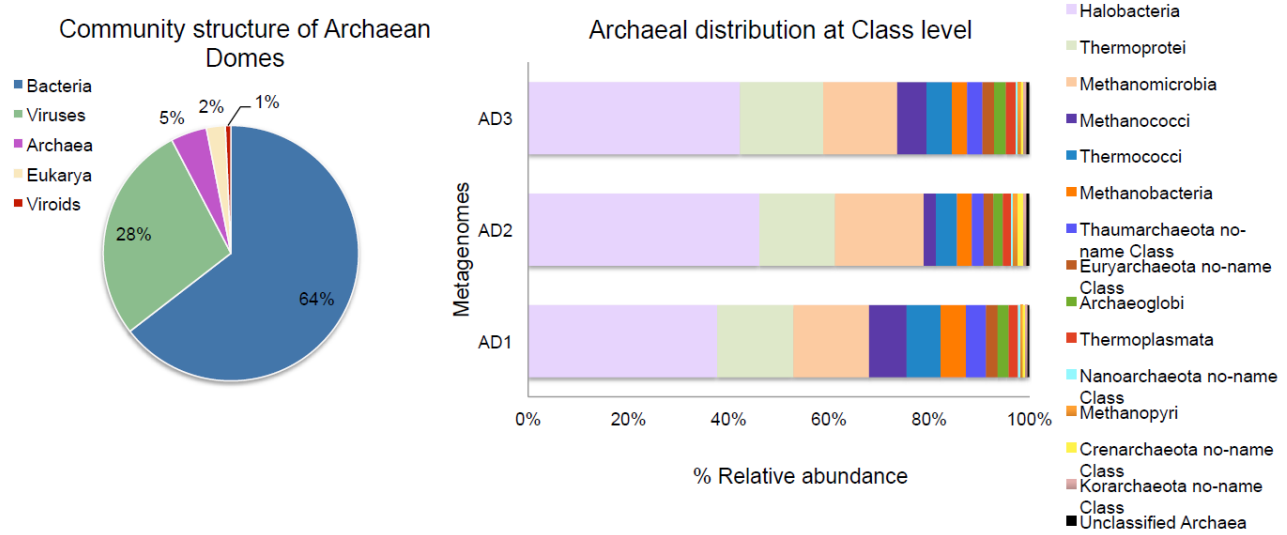

831

832

833 **Figure 2. Metagenomic data of Archaeal Domes.** Mean Community composition (left) and

834 Class-Level distribution (right) of Archaea in the three continuous season samples of Archaeal

835 Domes.

836

837

838

839

840



### A) Conditionally Rare Archaea Taxa through AD Temporals

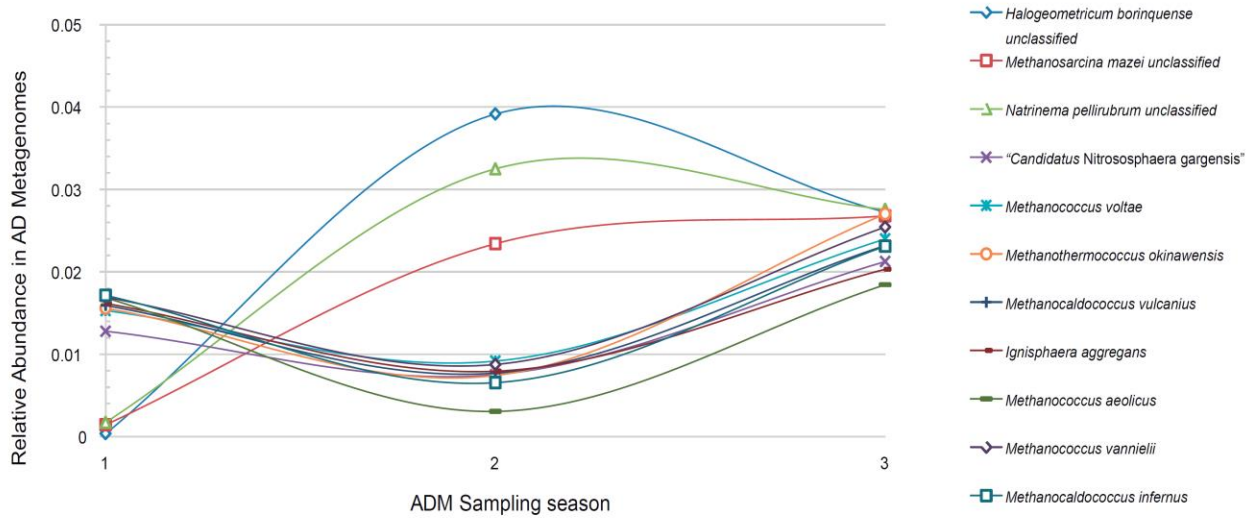

### B) Transiently Rare Archaea Taxa through AD Temporals

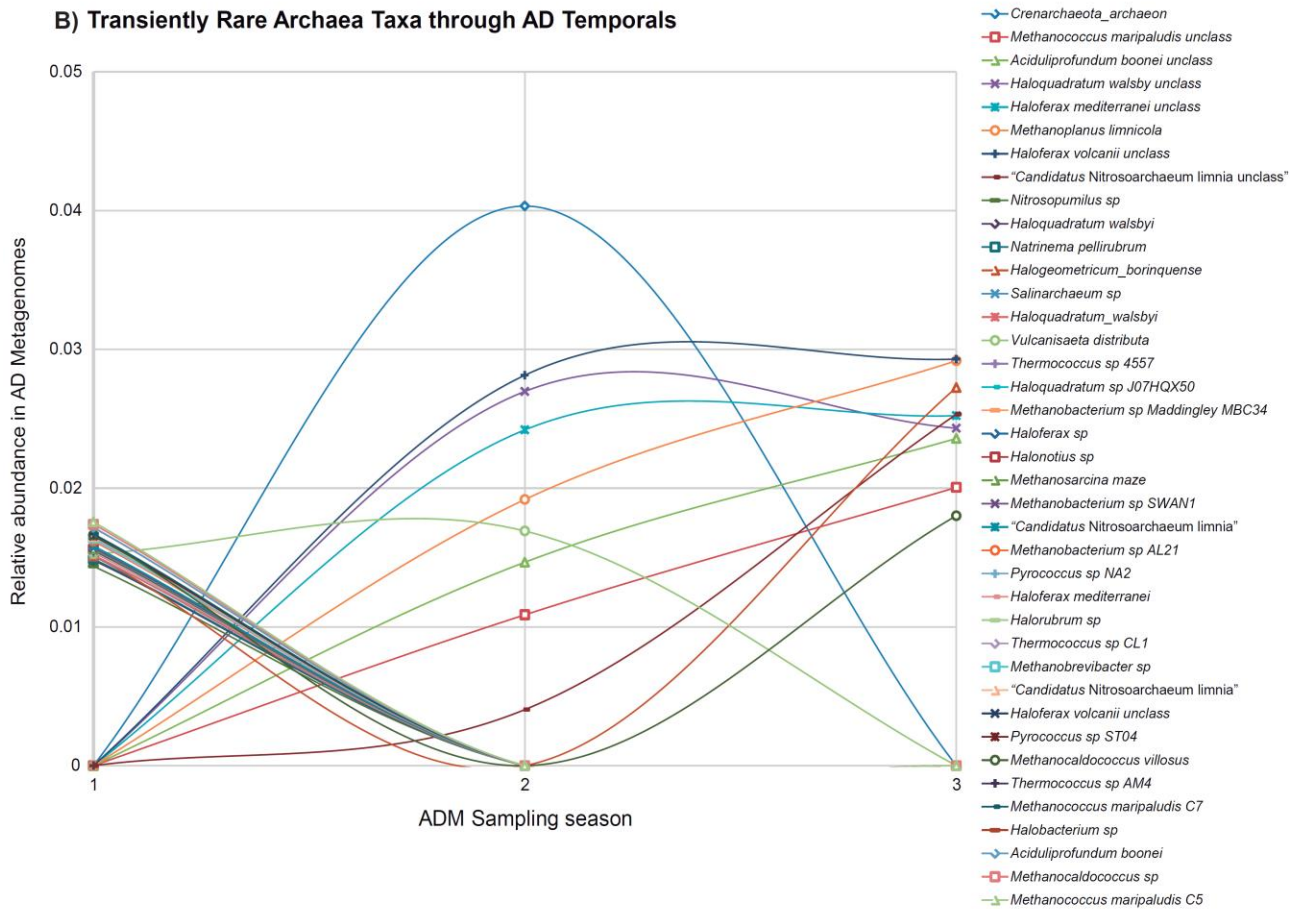

842

843

844

845 **Figure 3: Archaean rare biosphere.** A) Relative abundance of Conditionally Rare archaeal taxa  
846 through seasons in the Archaean Domes. B) Relative abundance of the Transiently Rare archaeal  
847 taxa through seasons in the Archaean Domes.

848

849

850

851

852

853

854

855

856

857

858

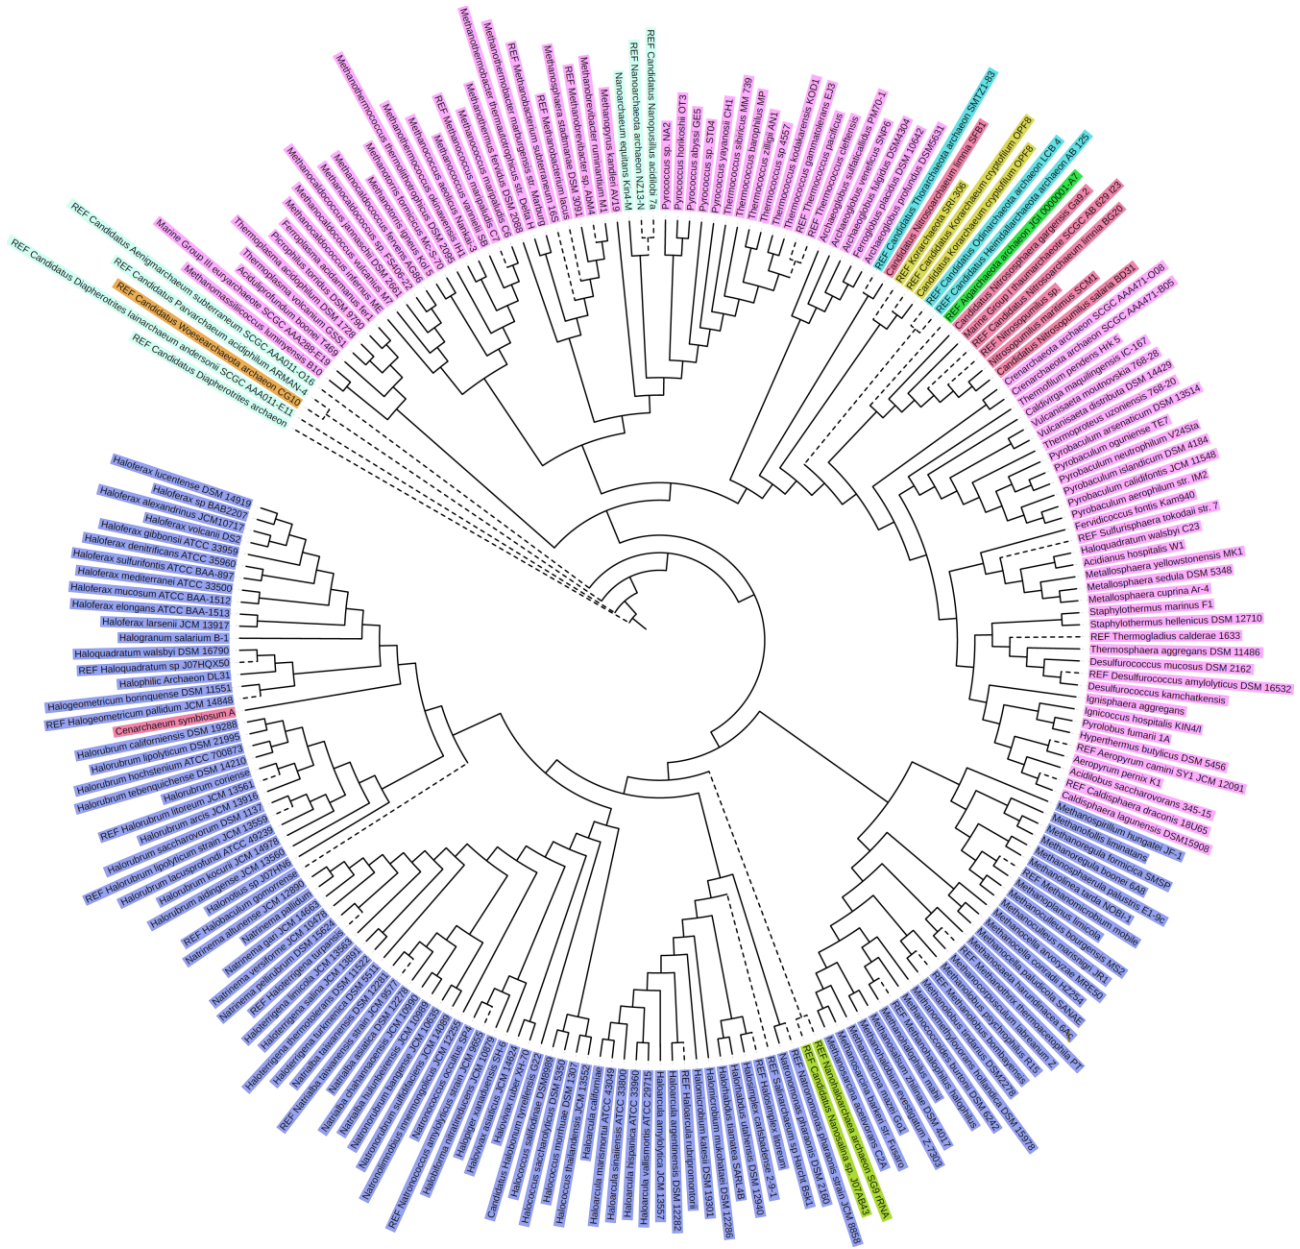

859

- Euryarchaeota phylum
- Crenarchaeota phylum
- Thaumarchaeota phylum
- Korarchaeota phylum
- Aigarchaeota phylum
- Woesearchaeota phylum
- Superphylum ASgard: Thorarchaeota, Odinararchaeota, Heimdallarchaeota, Lokiarchaeota (not shown)
- Superphylum DPANN : Diepherotritse, Parvarchaeota, Aenigmarchaeota, Nanohaloarchaeota, Nanoarchaeota
- Nanohaloarchaeota phylum
- 16s sequences from MetaPhlan2 ID
- Reference 16s sequences

860

861

862

863

864

865

866

867

868

869

870

871 **Figure 4.** Phylogenetic tree of the Archaea domain species found in AD1, AD2, AD3, though  
872 MetaPhlAn2 hit profile, based on nearly full-length 16S rRNA gene sequences, using maximum  
873 likelihood method, constructed by K-2 + G evolutionary model with 1,000 bootstraps  
874 replicates.

875

876

877

878

879

880

881

882

883

884

885 **SUPPLEMENTARY MATERIAL**

886

887

888

889

890

| <b>Physicochemical characteristics of AD</b> | <b>IBV</b> | <b>Temp</b> | <b>SPC</b> | <b>Salinity</b> | <b>TDS</b> | <b>pH</b> | <b>LDO</b>         | <b>CH<sub>4</sub></b> | <b>CO<sub>2</sub></b> |
|----------------------------------------------|------------|-------------|------------|-----------------|------------|-----------|--------------------|-----------------------|-----------------------|
| Water sample                                 | 7.7        | 31.45       | 77.21      | 53.36           | 49.62      | 9.94      | 78.4               | 12.4                  | Not detected          |
| Mat Sample                                   | 8.0        | 34.35       | 77.31      | 52.55           | 48.76      | 9.75      | 1: 165.3<br>2: 7.3 | N/A                   | Not detected          |

891

892 **Supp. Table 1. Physicochemical parameters measured for Archaean Domes on April**

893 **2016.** IBV (volts); Temp: temperature °C; SPC: specific conductance (μS/cm); Salinity (psu);

894 TDS: total dissolved solids (g/L); pH (0-14); LDO: dissolved oxygen (mg/L); CH<sub>4</sub> (μg/L)

895

896

897

898

899

900

901

902

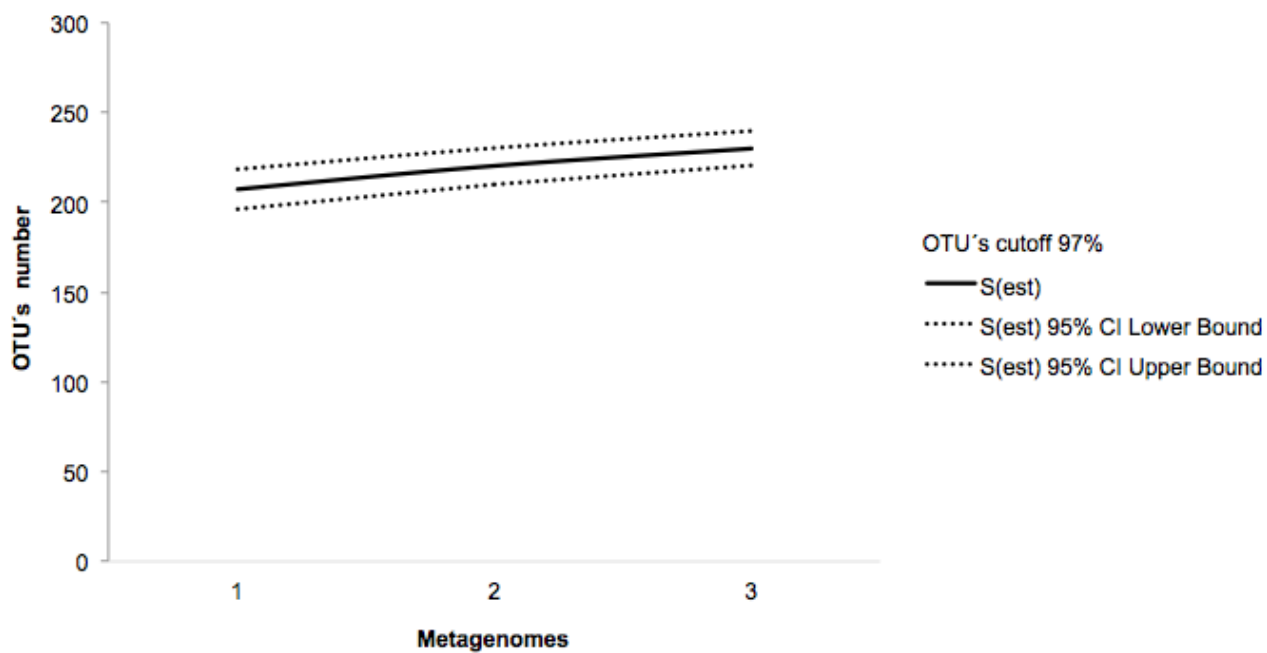

903

904 Supp. Fig. 1. **Rarefaction curve to estimate the richness of Archean Domain in the different**

905 **season samples.**

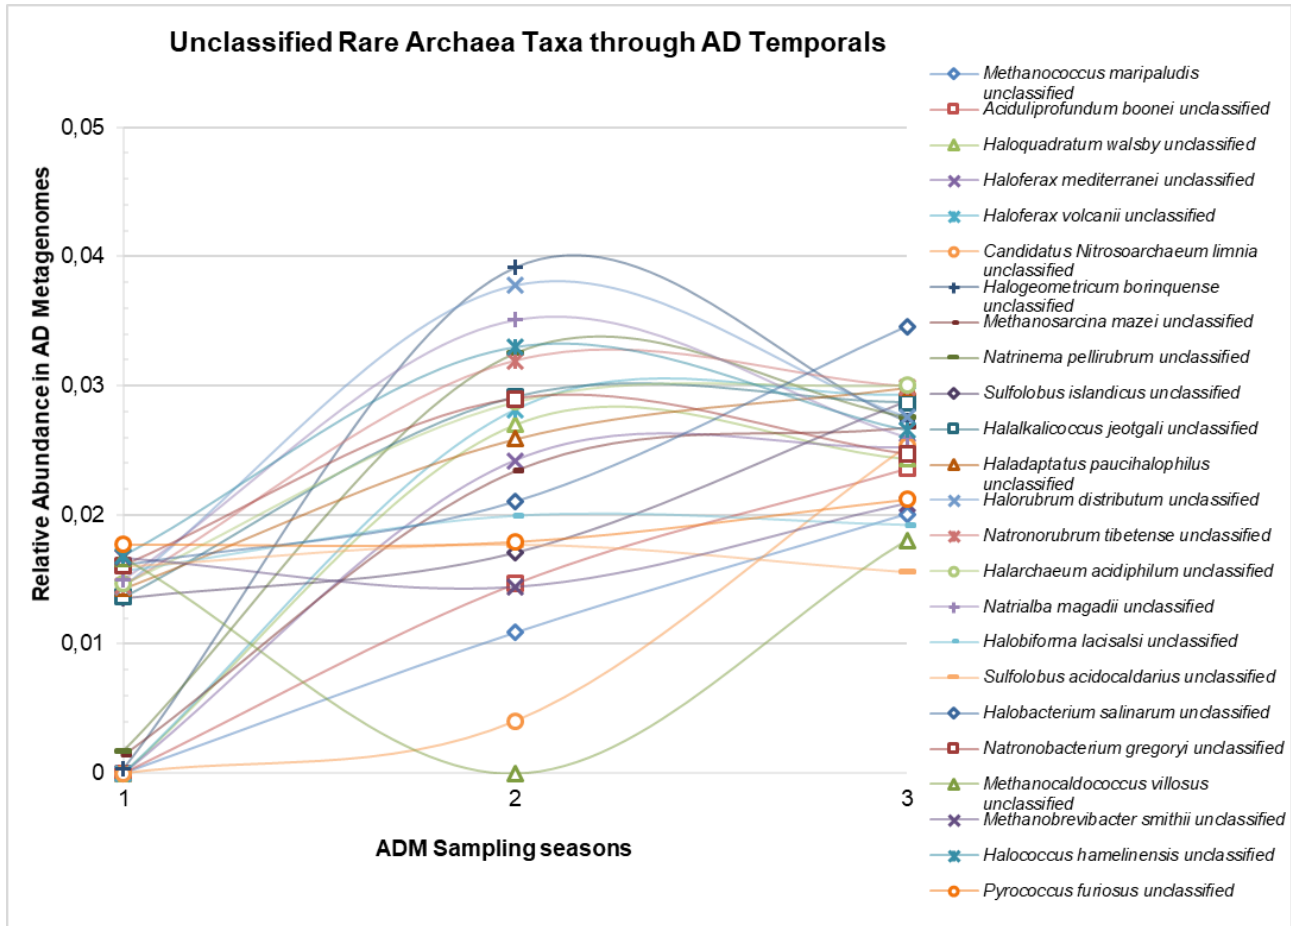

906

907

908 **Supp. Fig. 2. Unclassified Rare Archaea Taxa in the AD.**

909

910
